# Supplementary material for: Effects of endogenous testosterone on oscillatory activity during verbal working memory in youth
Source: PubMed Central journal article supplement — Hum Brain Mapp. 2024 Jul 1;45(10):e26774. doi: 10.1002/hbm.26774 (PMC11215982; doi:10.1002/hbm.26774), 2024-07-01
Supplement: HBM-45-e26774-s001.pdf [file HBM-45-e26774-s001.pdf]

## Supplemental Materials

### Effects of endogenous testosterone on oscillatory activity during verbal working memory in youth

Abraham D. Killanin<sup>a,b,c</sup>, Thomas W. Ward<sup>a,b,d</sup>, Christine M. Embury<sup>a,b</sup>, Vince D. Calhoun<sup>e</sup>, Yu-Ping Wang<sup>f</sup>, Julia M. Stephen<sup>g</sup>, Giorgia Picci<sup>a,b,d</sup>, Elizabeth Heinrichs-Graham<sup>a,b,d</sup>, and Tony W. Wilson<sup>a,b,c,d</sup>

<sup>a</sup> Institute for Human Neuroscience, Boys Town National Research Hospital, Boys Town, NE, USA

<sup>b</sup> Center for Pediatric Brain Health, Boys Town National Research Hospital, Boys Town, NE, USA

<sup>c</sup> College of Medicine, University of Nebraska Medical Center, Omaha, NE, USA

<sup>d</sup> Department of Pharmacology and Neuroscience, Creighton University, Omaha, NE, USA

<sup>e</sup> Tri-Institutional Center for Translational Research in Neuroimaging and Data Science (TReNDS), Georgia State University, Georgia Institute of Technology, and Emory University, Atlanta, GA, USA

<sup>f</sup> Department of Biomedical Engineering, Tulane University, New Orleans, LA, USA

<sup>g</sup> Mind Research Network, Albuquerque, NM, USA

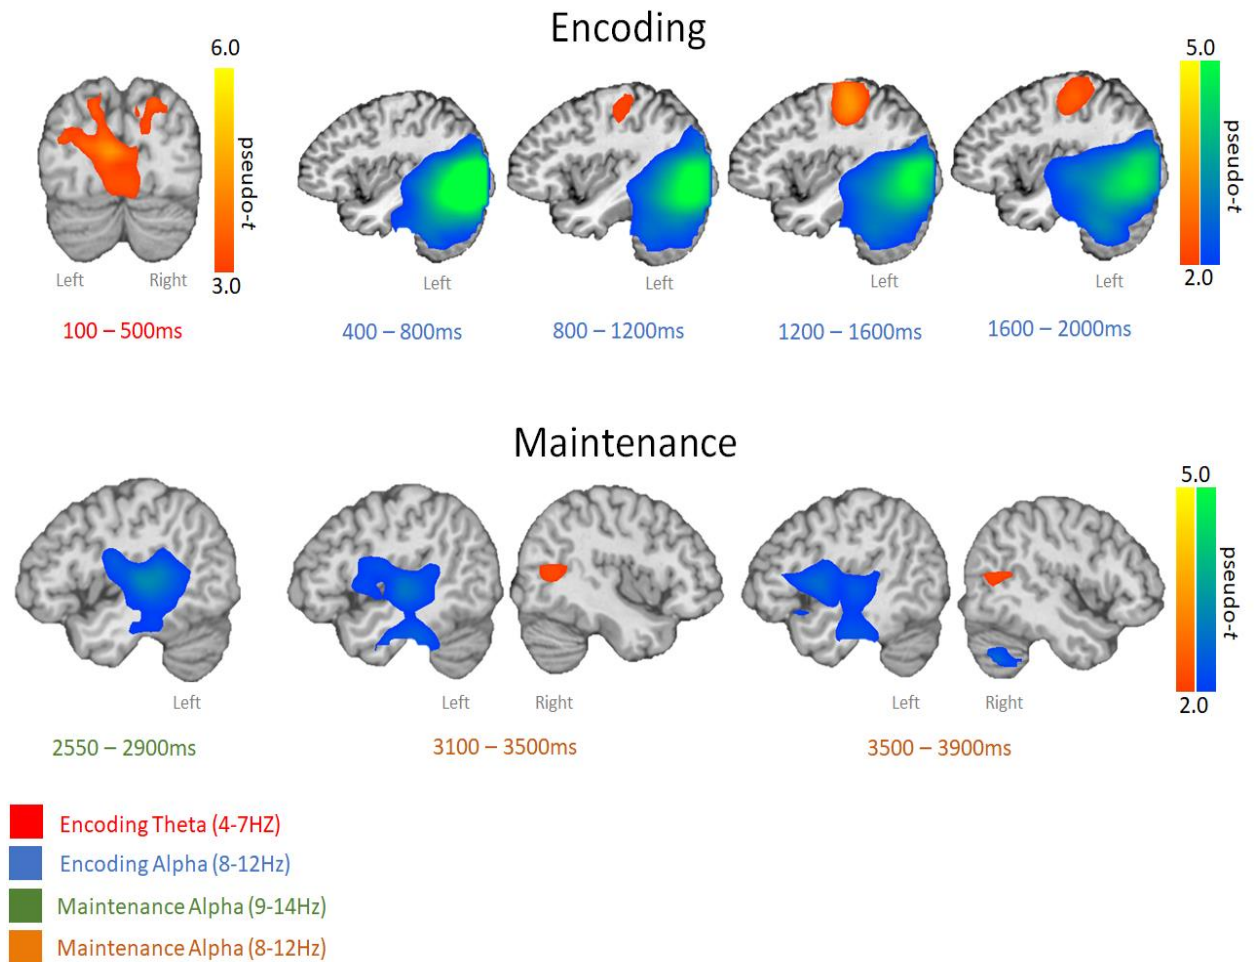

**Supplemental Figure 1:** Grand averaged images per time window during encoding (red and blue time window labels under each image), early maintenance (green labels), and late maintenance (orange time labels under images) show the progression of neural oscillatory responses during task performance. At the beginning of encoding, theta power increased in occipital cortices followed by alpha oscillations (i.e., decreases in power relative to baseline) in temporal, occipital, and cerebellar cortices. Such alpha changes spread to include more anterior cortices during later encoding. Alpha oscillations during maintenance were detected in parietal, temporal, and prefrontal regions. In later maintenance, increases in alpha power relative to baseline were detected in right occipitotemporal cortices, while left temporal, left prefrontal, and right cerebellar cortices exhibited decreases in alpha power relative to baseline.
